# Supplementary material for: Long-term micro/nanoplastic ingestion promotes sepsis by worsening kidney damage: a transcriptomics and metabolomics study
Source: Royal Society of Chemistry journal article supplement (doi:10.1039/d4en01206b), 2025-01-01
Supplement: d4en01206b4.pdf [file d4en01206b4.pdf]

### Supplementary Figure legends

**Figure S1.** serum ALT and AST test of mice (n=6, \* p<0.05 vs. SHAM, # p<0.05 vs. CLP, & p<0.05 vs. MP-0.1+CLP) . Data represented as means  $\pm$  SD.

**Figure S2. H&E staining of Heart, Liver, spleen and lung.**

Scale bar: 50  $\mu$ m. The green arrow represents congestion, the blue arrow represents edema, the yellow arrow represents vacuolar degeneration, the red arrow represents inflammatory cells, the orange arrow represents necrotic cells, the brown arrow represents eosinophilic enhancement.
