# Supplementary figures and images for: Long-term micro/nanoplastic ingestion promotes sepsis by worsening kidney damage: a transcriptomics and metabolomics study
Source: Royal Society of Chemistry journal article supplement (doi:10.1039/d4en01206b), 2025-01-01

Figure S2

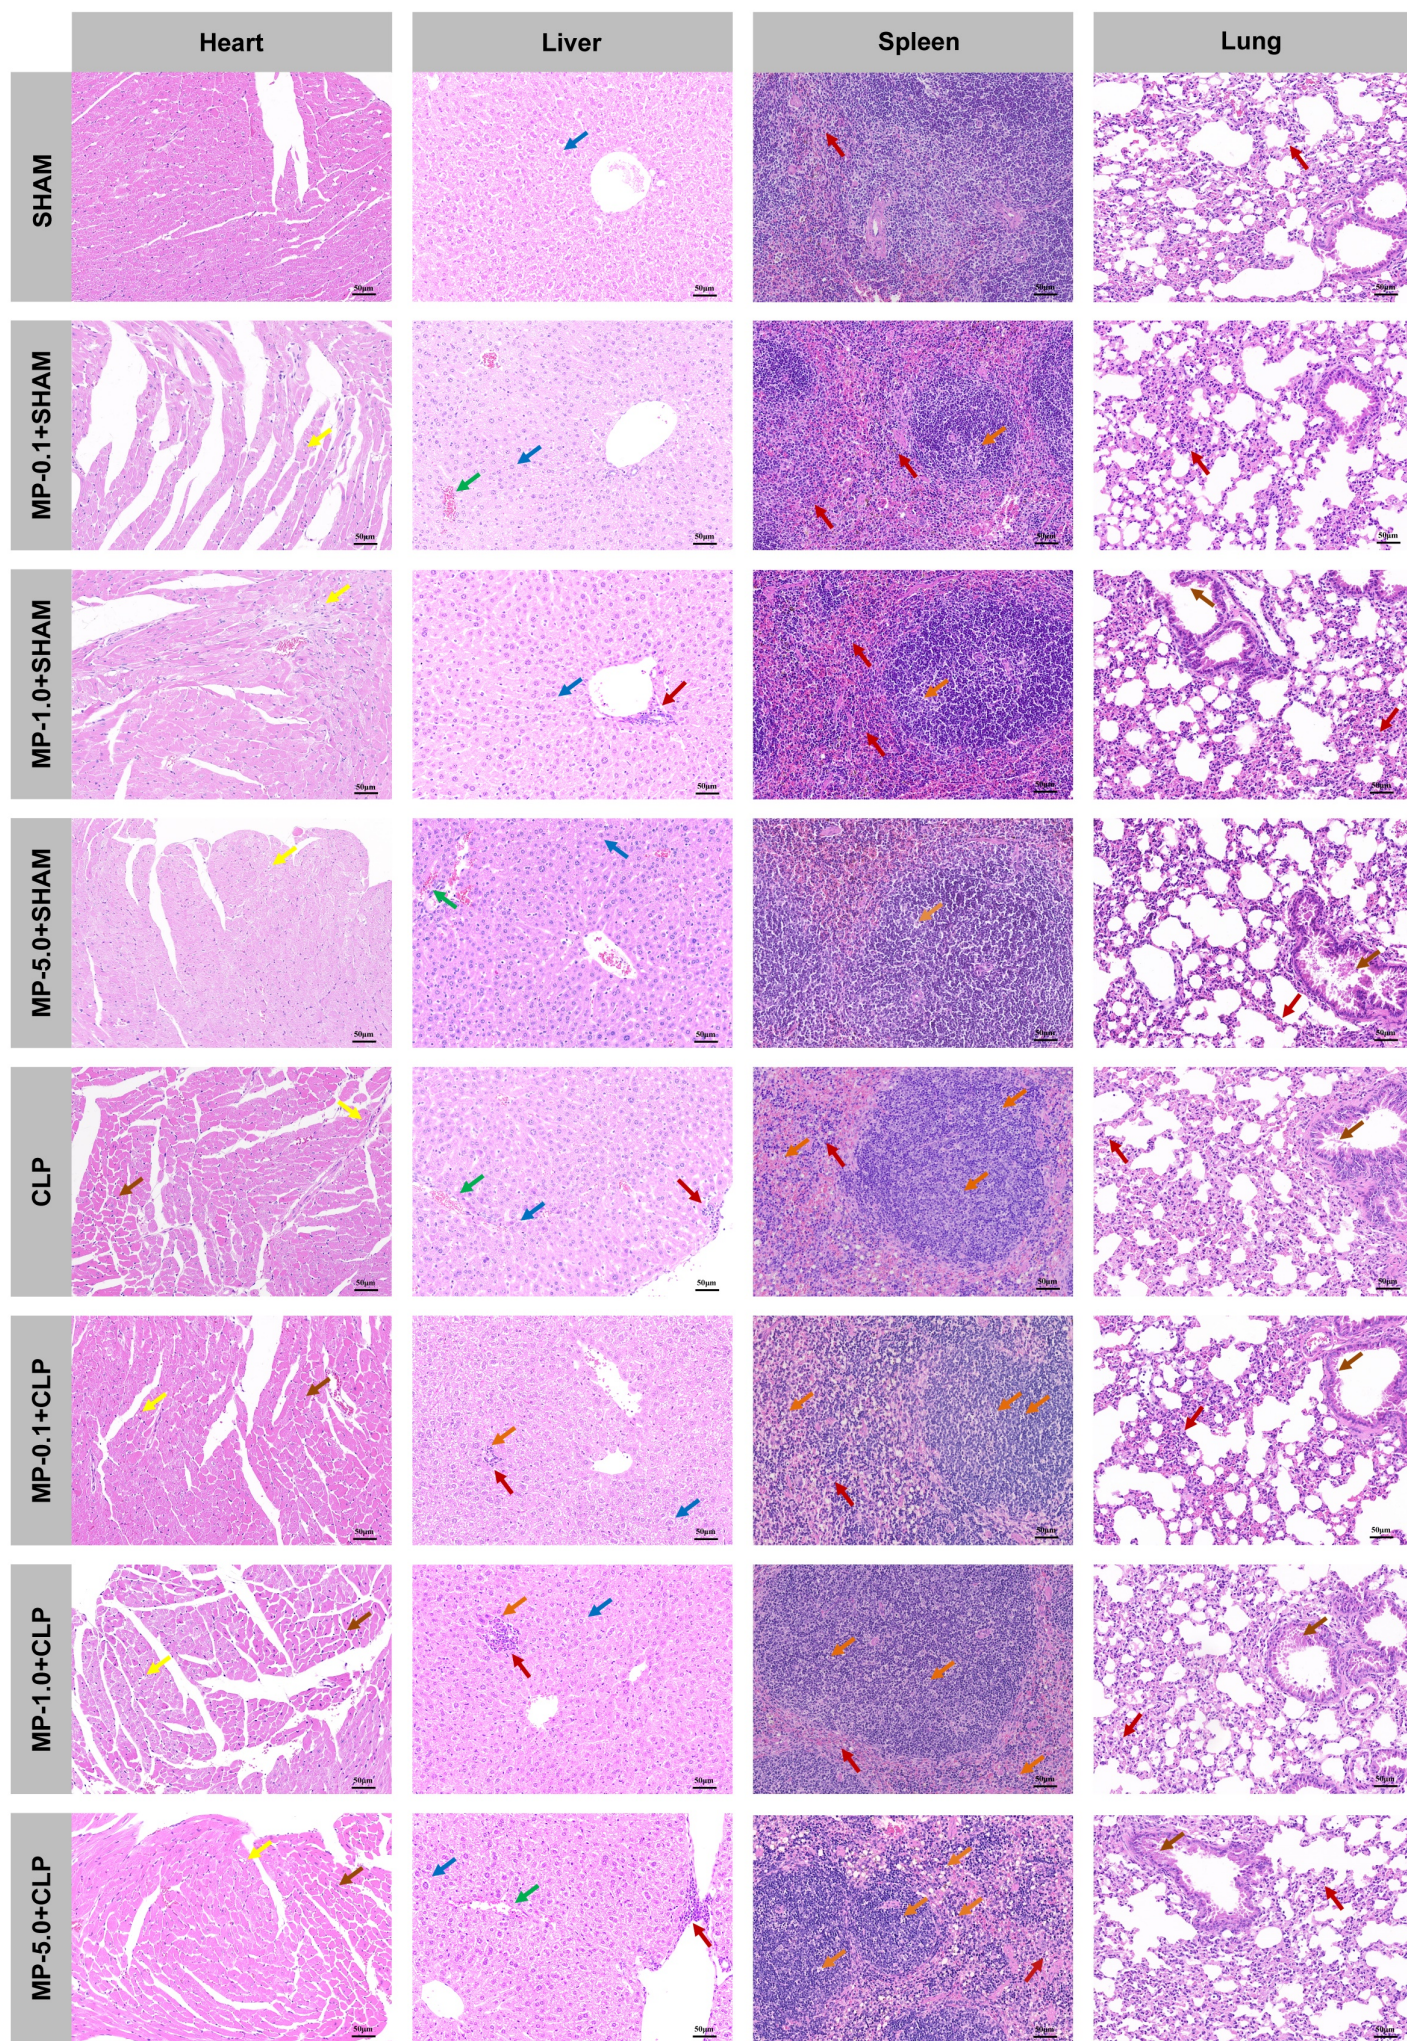

Supplement: d4en01206b2.pdf [file d4en01206b2.pdf]
